# Supplementary material for: The effect of shunt surgery on neuropsychological performance in normal pressure hydrocephalus: a systematic review and meta-analysis
Source: PubMed Central journal article supplement (PMC4971036; doi:10.1007/s00415-016-8097-0), 2016-03-26
Supplement: 415_2016_8097_MOESM1_ESM.pdf [file 415_2016_8097_MOESM1_ESM.pdf]

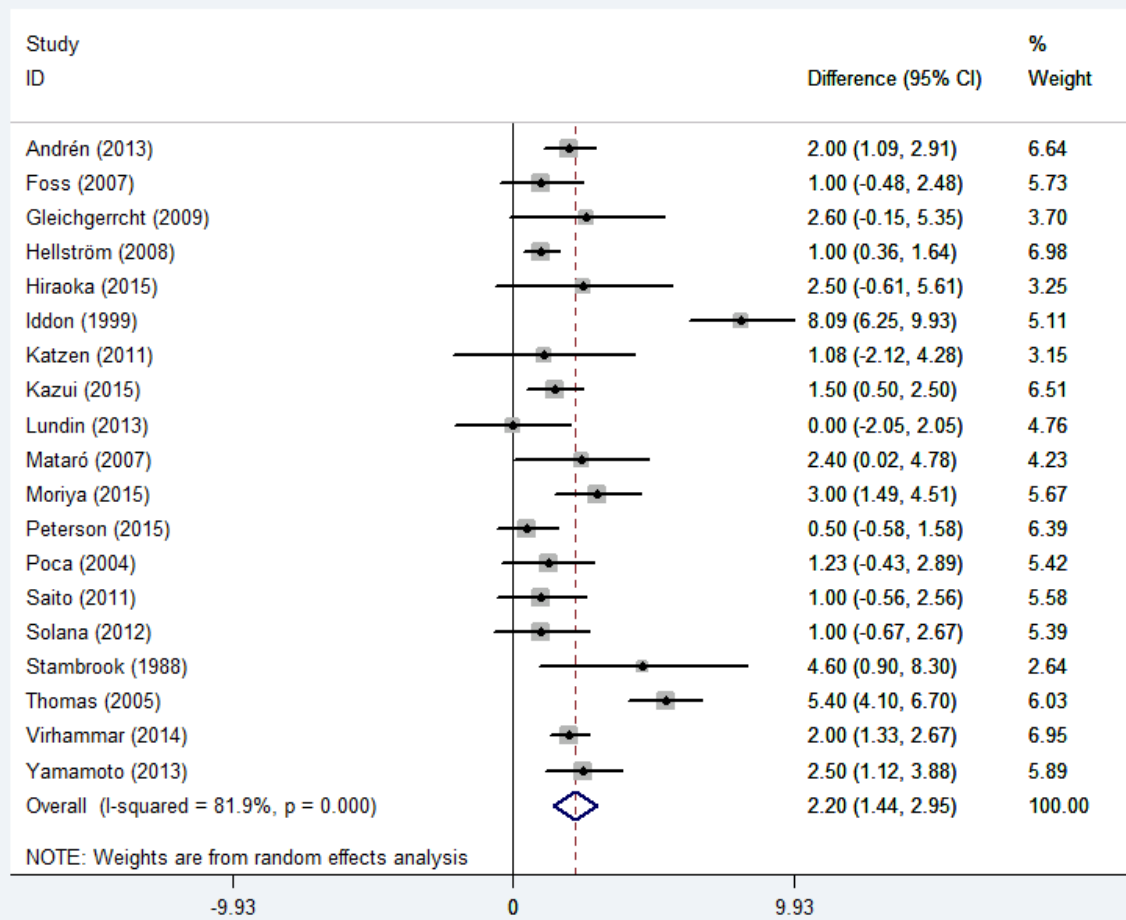

**Figure 1.** Forest plot for difference in MMSE. The pooled outcome was determined using a random-effects model. Average differences are shown with 95 per cent confidence intervals.

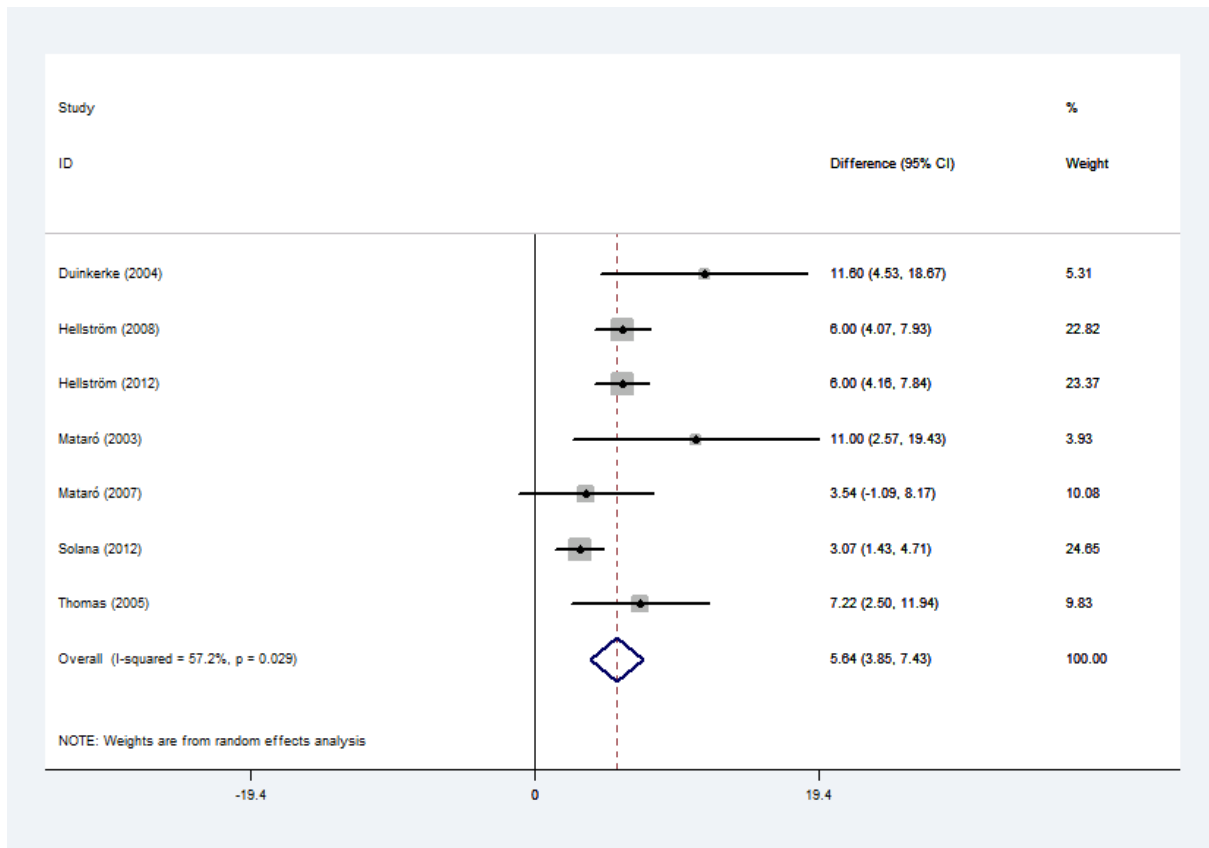

**Figure 2.** Forest plot for difference in RAVLT total verbal recall. The pooled outcome was determined using a random-effects model. Average differences are shown with 95 per cent confidence intervals.

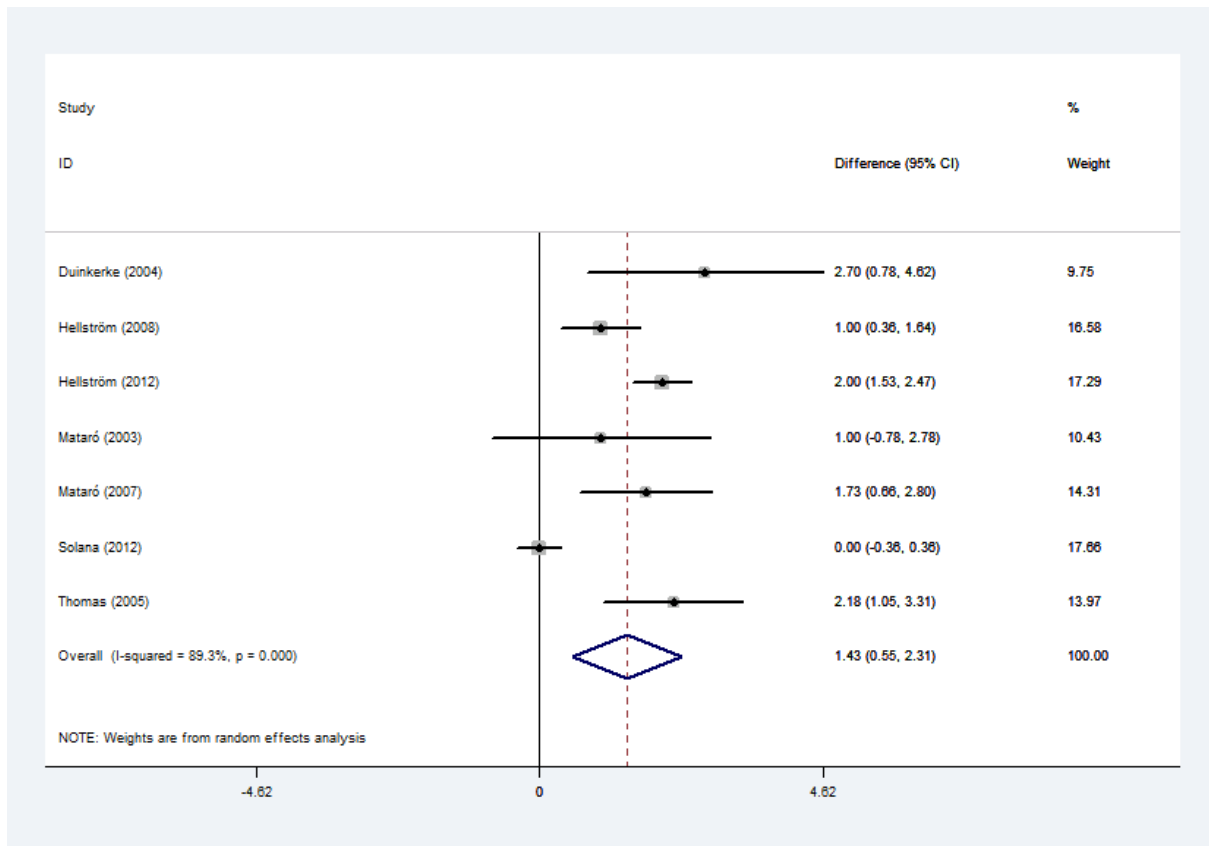

**Figure 3.** Forest plot for difference in RAVLT delayed verbal recall. The pooled outcome was determined using a random-effects model. Average differences are shown with 95 per cent confidence intervals.

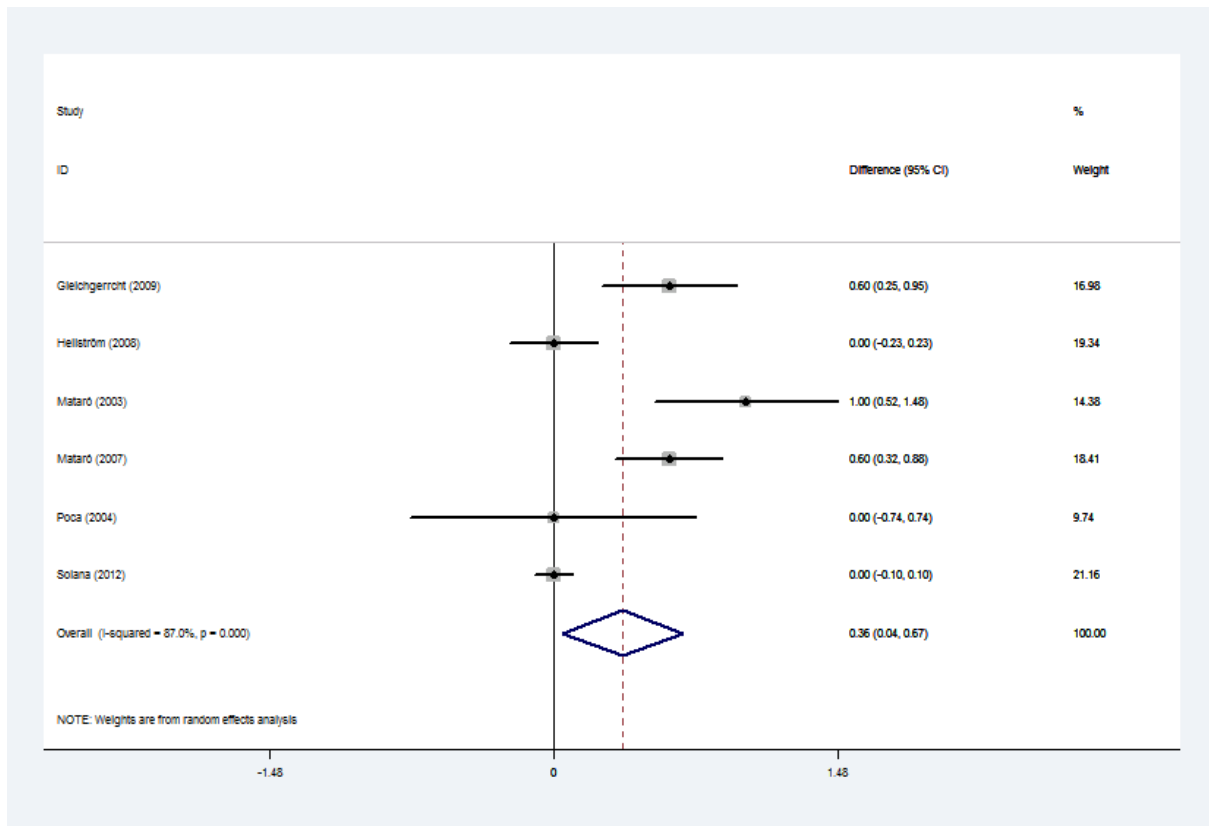

**Figure 4.** Forest plot for difference in backwards digit span score. The pooled outcome was determined using a random-effects model. Average differences are shown with 95 per cent confidence intervals.

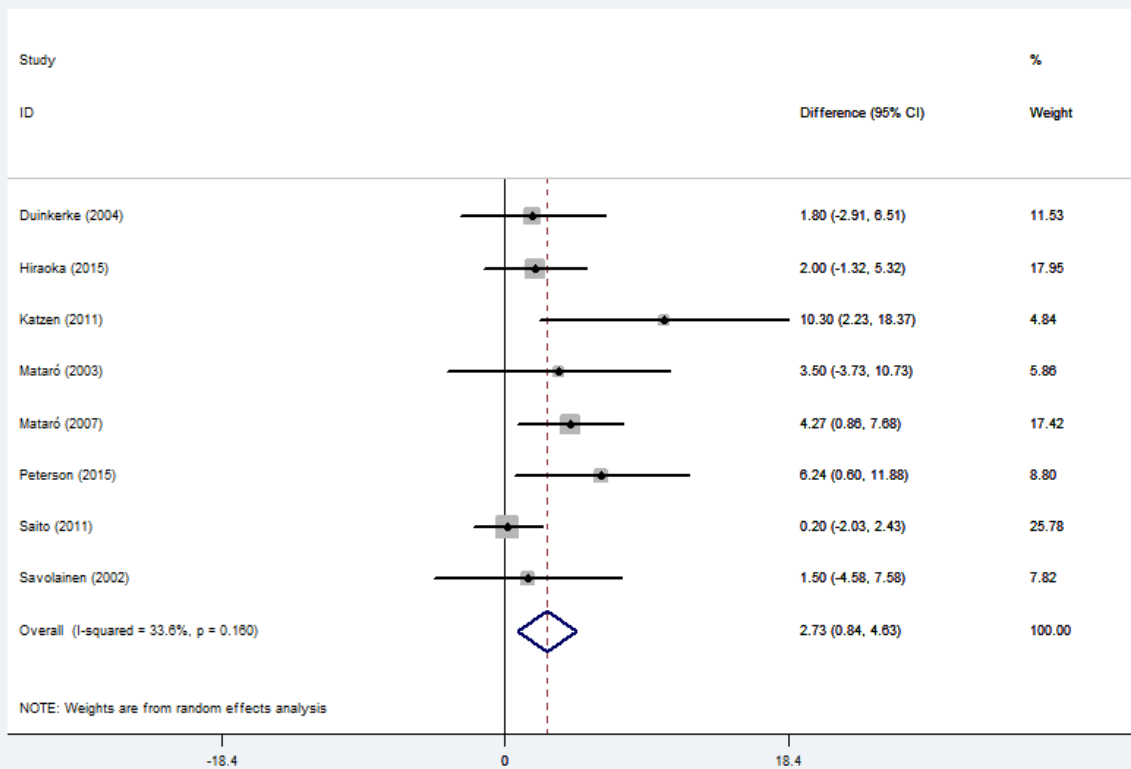

**Figure 5.** Forest plot for difference in phonemic verbal fluency. The pooled outcome was determined using a random-effects model. Average differences are shown with 95 per cent confidence intervals.

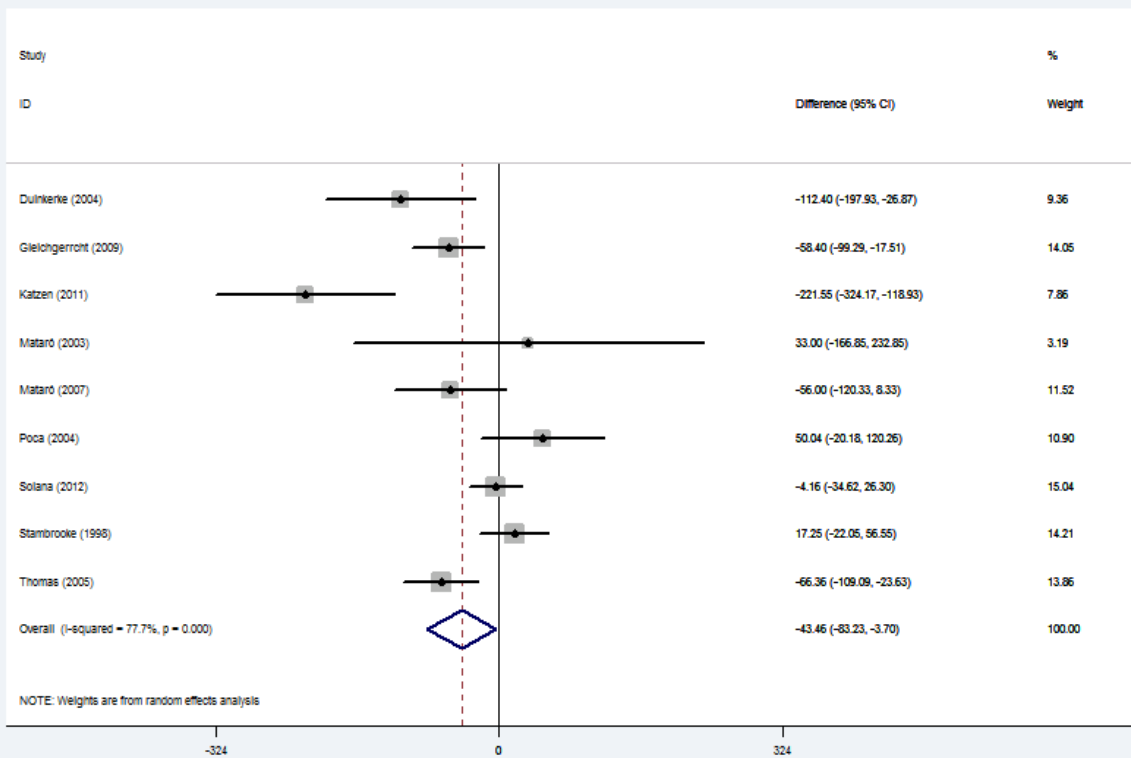

**Figure 6.** Forest plot for difference in trail making test B score (seconds to complete). The pooled outcome was determined using a random-effects model. Average differences are shown with 95 per cent confidence intervals.

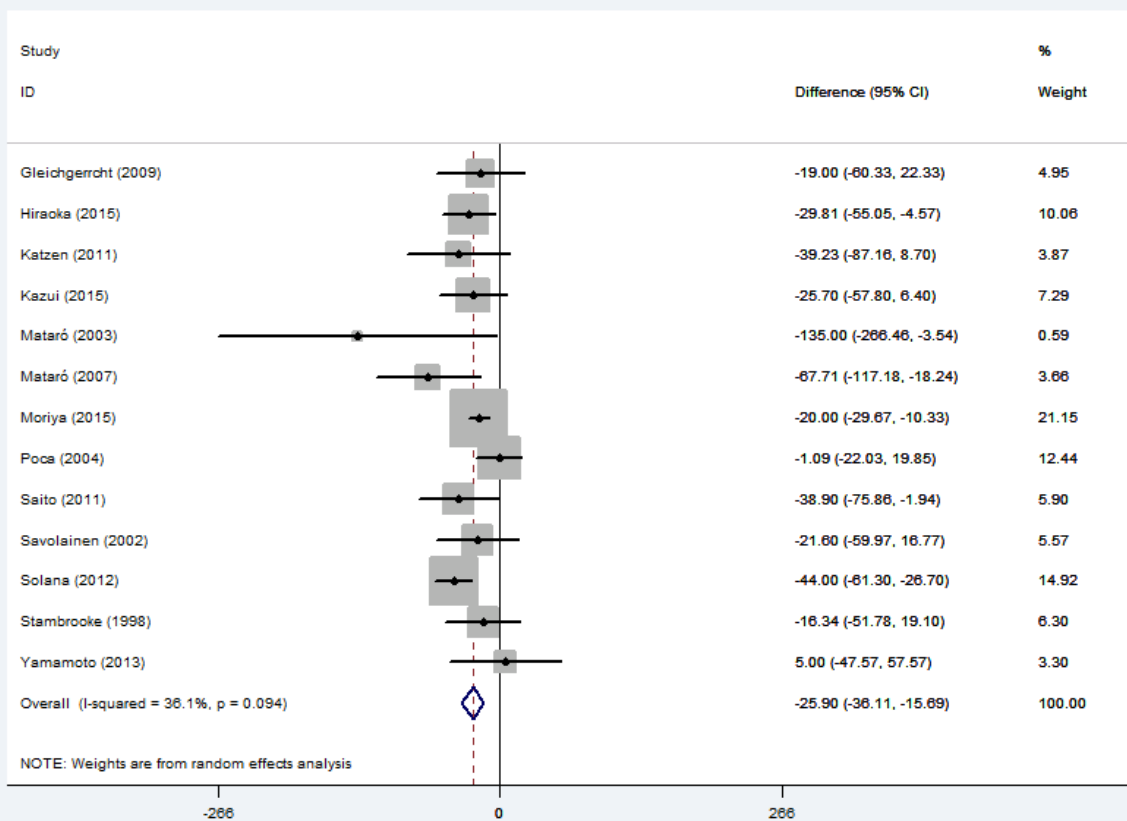

**Figure 7.** Forest plot for difference in trail making test A score (seconds to complete). The pooled outcome was determined using a random-effects model. Average differences are shown with 95 per cent confidence intervals.
